# Supplementary material for: Long-Term Stable Mixed Chimerism after Hematopoietic Stem Cell Transplantation in Patients with Non-Malignant Disease, Shall We Be Tolerant?
Source: PubMed Central journal article supplement (PMC4859543; doi:10.1371/journal.pone.0154737), 2016-05-06

# S2 Figure

A

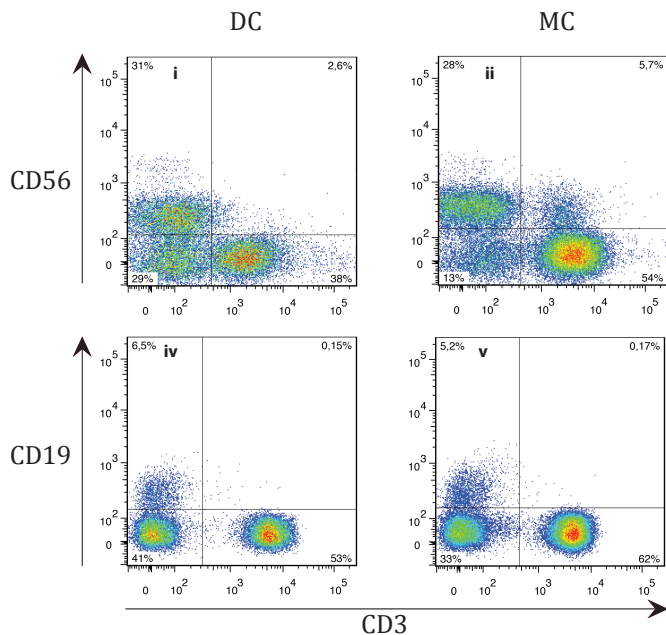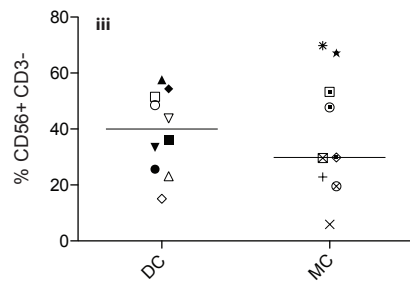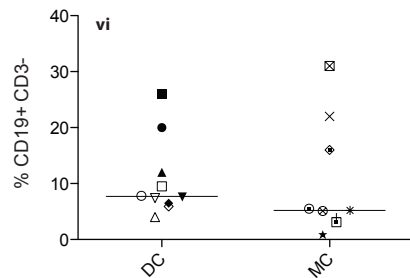

B

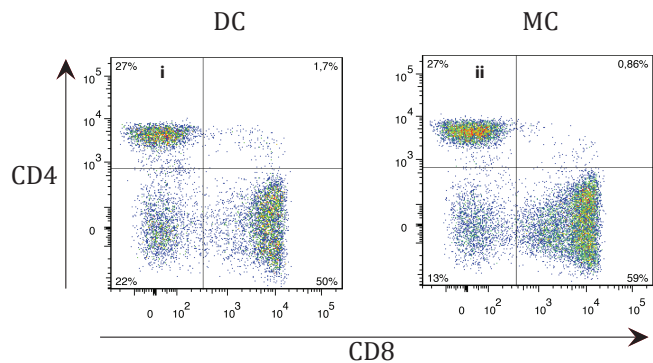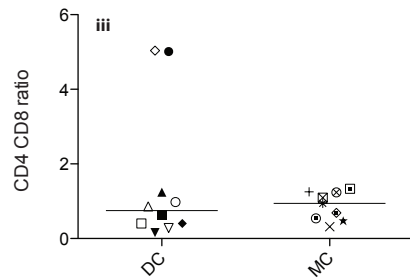

Supplement: pone.0154737.s002.pdf [file pone.0154737.s002.pdf]
